# Supplementary material for: Rapid meniscus-guided printing of stable semi-solid-state liquid metal microgranular-particle for soft electronics
Source: PubMed Central journal article supplement (PMC9098628; doi:10.1038/s41467-022-30427-z), 2022-05-12
Supplement: 41467_2022_30427_MOESM3_ESM.pdf [file 41467_2022_30427_MOESM3_ESM.pdf]

File name: Supplementary Movie 1

Description: Printing of bare liquid metal particle-based ink

File name: Supplementary Movie 2

Description: Printing of polyelectrolyte-attached liquid metal particle-based ink
